## Response to multiple rapid swallows shows impaired inhibitory pathways in distal esophageal spasm patients with and without concomitant esophagogastric junction outflow obstruction

Patricia V. Hernandez,<sup>1</sup> Luis R. Valdovinos,<sup>1,2</sup> Jennifer L. Horsley-Silva,<sup>1</sup> Miguel A. Valdovinos,<sup>2</sup> Michael D. Crowell,<sup>1</sup> Marcelo F. Vela<sup>1</sup>

<sup>1</sup>Division of Gastroenterology and Hepatology, Mayo Clinic Arizona <sup>2</sup>Department of Gastroenterology, Laboratorio de Motilidad Gastrointestinal, Instituto Nacional de Ciencias Médicas y Nutrición Salvador Zubirán, 14080, C.D.M.X., Mexico

**SUMMARY.** Distal esophageal spasm (DES) is a motility disorder characterized by premature contraction of the esophageal body during single swallows. It is thought to be due to impairment of esophageal inhibitory pathways, but studies to support this are limited. The normal response to multiple rapid swallows (MRS) is deglutitive inhibition of the esophageal body during the MRS sequence. Our aim was to compare the response to MRS in DES patients and healthy control subjects. Response to MRS during HRM was evaluated in 19 DES patients (8 with and 11 without concomitant esophagogastric junction outflow obstruction [EGJOO]) and 24 asymptomatic healthy controls. Patients with prior gastroesophageal surgery, peroral endoscopic myotomy, pneumatic dilation, esophageal botulinum toxin injection within 6 months of HRM, opioid medication use, and esophageal stricture were excluded. Response to MRS was evaluated for complete versus impaired inhibition (esophageal body contractility with distal contractile integral [DCI] > 100 mmHg-sec-cm during MRS), presence of post-MRS contraction augmentation (DCI post MRS greater than single swallow mean DCI), and integrated relaxation pressure (IRP). Impaired deglutitive inhibition during MRS was significantly more frequent in DES compared to controls (89% vs. 0%,  $P < 0.001$ ), and frequency was similar for DES with versus without concomitant EGJOO (100% vs. 82%,  $P = 0.48$ ). The proportion of subjects with augmentation post MRS was similar for both groups (37% vs. 38%,  $P = 1.00$ ), but mean DCI post MRS was higher in DES than controls (3360.0 vs. 1238.9,  $P = 0.009$ ). IRP was lower during MRS compared to single swallows in all patients, and IRP during MRS was normal in 5 of 8 patients with DES and EGJOO. Our study suggests that impaired deglutitive inhibition during MRS is present in the majority of patients with DES regardless of whether they have concomitant EGJOO, and future studies should explore the usefulness of incorporating response to MRS in the diagnosis of DES.

**KEY WORDS:** distal esophageal spasm, high-resolution esophageal manometry, multiple rapid swallows.

### INTRODUCTION

Distal esophageal spasm (DES) is a motility disorder characterized by premature contraction of the esophageal body during single swallows, usually presenting with dysphagia and chest pain.<sup>1,2</sup> DES is not a common condition, found in less than 5% of patients undergoing esophageal motility testing for dysphagia.<sup>3</sup> In 1958, DES was described manometrically by Creamer et al. as a replacement of peristaltic waves by a simultaneous and prolonged rise of pressure in the distal esophagus.<sup>4,5</sup> For a long time, based on conventional, low-resolution manometry

and line tracings, DES was defined by the presence of simultaneous esophageal contractions in >10% of wet swallows, with intermittent normal peristalsis.<sup>1,2</sup> In 2011, using high-resolution esophageal manometry (HRM) and esophageal pressure topography analysis, Pandolfino et al. found that compared to velocity of contractile front, reduced distal latency (DL) correlates better with esophageal symptoms.<sup>6</sup> More recently, the most current version of the Chicago classification of esophageal motor disorders based on HRM (version 3.0) defined DES as the presence of reduced DL ( $\leq 4.5$  seconds) in  $\geq 20\%$  swallows.<sup>7</sup> Some

Address correspondence to: Marcelo F. Vela, MD, Division of Gastroenterology and Hepatology, Mayo Clinic, 13400 E Shea Blvd, Scottsdale, AZ 85259. Email: Vela.Marcelo@mayo.edu

Authors' disclosure: No conflict of interest.

Funding and disclosure: No financial support was used for this study.

patients with DES may have concomitant esophagogastric junction outflow obstruction (EGJOO) defined by a median integrated relaxation pressure  $>15$  mmHg, but they do not meet criteria for achalasia type III because peristalsis is normal in some swallows and spastic in others (there is no normal peristalsis in achalasia type III).

Although the pathophysiology of DES is not completely understood, it is thought to be due to impairment of esophageal inhibitory pathways, resulting in premature contractions in the distal esophagus, but studies to support this are limited.<sup>8</sup> In contrast, in healthy individuals, a balance between excitatory and inhibitory stimuli plays an important role in the organized and sequential esophageal body contractility seen during normal esophageal peristalsis.<sup>9–11</sup> Quickly after deglutition, a normal wave of inhibition to the esophageal muscle, called deglutitive inhibition, spreads over to the entire distal esophageal body, lasting longer in progressively more distal segments.<sup>9,11</sup> Some authors have validated that afferent signals starting from the pharynx inhibit progression of primary esophageal peristalsis, regardless of the amount of volume ingested.<sup>12–14</sup> This inhibition is followed by excitation, which is induced by lumen distension in order to maintain esophageal clearance of residual food bolus after swallowing.<sup>14–17</sup>

Assessment of response to multiple rapid swallows (MRS) during HRM enables detection of impaired inhibition during MRS. Of note, impaired inhibition may also lead to incomplete EGJ relaxation, manifested manometrically as EGJOO. Healthy subjects respond to MRS by deglutitive inhibition during the MRS sequence, followed by a post-MRS peristaltic contraction that often has increased contractile vigor compared to that of single swallows. We hypothesized that deglutitive inhibition is impaired in DES patients. Our aim was to compare response to MRS in DES patients (with and without concomitant EGJOO) and asymptomatic healthy control subjects.

## MATERIALS AND METHODS

### Subjects

Patients diagnosed with DES based upon Chicago classification v3.0 were identified from a prospectively maintained esophageal motility database at Mayo Clinic, Scottsdale, Arizona, USA. HRM was performed after informed consent in asymptomatic healthy control subjects at Instituto Nacional de Ciencias Medicas y Nutricion Salvador Zubiran, Mexico City, Mexico. Demographic data and symptom presentation in DES patients was obtained from the motility database as well as medical chart review and collected prospectively in the control subjects. Patients with prior gastroesophageal surgery, pneumatic dilation, peroral endoscopic

myotomy (POEM), esophageal botulinum toxin injection within 6 months of HRM, opioid medication use, and esophageal stricture were excluded. The Institutional Review Board (IRB) approved the study.

### High-resolution esophageal manometry (HRM)

HRM was performed following the same testing protocol in all study subjects (DES patients and healthy controls), using a catheter with 36 circumferential solid-state pressure sensors spaced at 1-cm intervals (Medtronic). Ten 5-ml liquid single swallows were administered, followed by an MRS sequence which consisted of five 2-ml rapid sequence liquid swallows.

Analysis of HRM was completed using ManoView software (Medtronic, Duluth, GA). Esophagogastric junction (EGJ) resting pressure, EGJ integrated relaxation pressure (IRP), DL, and distal contractile integral (DCI) were calculated for the 10 single swallows, and Chicago classification v3.0 was applied to diagnose esophageal motility disorders.<sup>18</sup> DES was defined by the presence of  $\geq 20\%$  swallows with  $DL \leq 4.5$  seconds and normal median IRP. Patients with elevated median IRP ( $>15$  mmHg) and  $\geq 20\%$  swallows with  $DL \leq 4.5$  seconds, but who had some preserved normal peristalsis and thus did not meet criteria for achalasia type III, were considered as having DES with concomitant EGJOO. Two parameters were used to assess the esophageal body contractile response to MRS: (a) complete versus impaired inhibition (the latter defined as esophageal body contractility with  $DCI > 100$  mmHg-sec-cm during MRS) and (b) presence of post-MRS contraction augmentation, defined as DCI post MRS greater than single swallow mean DCI.<sup>18</sup> Integrated relaxation pressure (IRP) was also measured during MRS. Any study that did not follow protocol or contained artifact was excluded.

### Power analysis

The primary goal of the proposed study was to test the null hypothesis that the proportion of subjects with impaired inhibition during MRS would be identical between patients with DES and asymptomatic controls. The criterion for significance ( $\alpha$ ) was set at 0.05 (two-tailed). A sample size of 18 subjects in each of the two groups (total  $n = 36$ ), has greater than 80% power to yield a statistically significant result using the assumption that the difference in proportions is 0.5 (controls = 30% vs. DES = 80%). This effect was selected as the smallest effect that would be important to detect, in the sense that any smaller effect would not be of clinical or substantive significance.<sup>19</sup>









diagnostic criteria results in better correlation with symptoms, along with an improved ability to predict the need for and response to therapy.

The present study has some limitations. Firstly, the sample size is relatively small. However, we anticipated big differences among the groups in the power analysis, and the striking disparity in the frequency of abnormal response to MRS in DES versus healthy controls allowed us to find highly significant differences even with a modest number of subjects in each group. Secondly, we assessed response to a single MRS sequence, and a recent study suggested that three MRS sequences are needed for accurate prediction of contraction reserve (defined by contractile vigor of post-MRS peristalsis).<sup>29</sup> While IRP measurement during MRS has been found to be reliable with a single MRS sequence,<sup>30</sup> the optimal number of MRS sequences needed to accurately assess impaired esophageal body contractile inhibition has not been defined. Lastly, different age group and ethnicity among DES patients and healthy controls should be considered; of note Vega et al. previously showed that there were no differences in LES pressure and distal esophageal body function among Hispanic and Caucasian American healthy volunteers.<sup>31</sup>

In conclusion, impaired deglutitive inhibition during MRS is present in the majority of patients with DES, supporting impaired inhibitory pathways in the esophagus as a mechanism of action in this disorder. Impaired inhibition during MRS could potentially be incorporated as part of the diagnostic criteria for DES, especially in patients in whom the diagnosis of DES may be inconclusive, but additional studies will be needed to determine whether this may result in better correlation with esophageal symptoms or improvements in the ability to predict response to therapy.

## References

- Richter J E, Castell D O. Diffuse esophageal spasm: a reappraisal. *Ann Intern Med* 1984; 100: 242–5.
- Spechler S J, Castell D O. Classification of oesophageal motility abnormalities. *Gut* 2001; 49: 145–51.
- Sperandio M, Tutuian R, Gideon R M, Katz P O, Castell D O. Diffuse esophageal spasm: not diffuse but distal esophageal spasm (DES). *Dig Dis Sci* 2003; 48: 1380–4.
- Khalaf M, Chowdhary S, Elias P S, Castell D. Distal esophageal spasm: a review. *Am J Med* 2018; 131: 1034–40.
- Creamer B, Donoghue E, Code C F. Pattern of esophageal motility in diffuse spasm. *Gastroenterology* 1958; 34: 782–96.
- Pandolfino J E, Roman S, Carlson D *et al.* Distal esophageal spasm in high-resolution esophageal pressure topography: defining clinical phenotypes. *Gastroenterology* 2011; 141: 469–75.
- Kahrilas P J, Bredenoord A J, Fox M *et al.* The Chicago classification of esophageal motility disorders, v3.0. *Neurogastroenterol Motil* 2015; 27: 160–74.
- Roman S, Kahrilas P J. Distal esophageal spasm. *Curr Opin Gastroenterol* 2015; 31: 328–33.
- Mittal R K. Regulation and dysregulation of esophageal peristalsis by the integrated function of circular and longitudinal muscle layers in health and disease. *Am J Physiol Gastrointest Liver Physiol* 2016; 311: G431–43.
- Sifrim D, Janssens J, Vantrappen G. A wave of inhibition precedes primary peristaltic contractions in the human esophagus. *Gastroenterology* 1992; 103: 876–82.
- Sifrim D, Janssens J, Vantrappen G. Failing deglutitive inhibition in primary esophageal motility disorders. *Gastroenterology* 1994; 106: 875–82.
- Bardan E, Xie P, Ren J, Dua K, Shaker R. Effect of pharyngeal water stimulation on esophageal peristalsis and bolus transport. *Am J Physiol* 1997; 272: G265–71.
- Behar J, Biancani P. Pathogenesis of simultaneous esophageal contractions in patients with motility disorders. *Gastroenterology* 1993; 105: 111–8.
- Trifan A, Shaker R, Ren J *et al.* Inhibition of resting lower esophageal sphincter pressure by pharyngeal water stimulation in humans. *Gastroenterology* 1995; 108: 441–6.
- Goyal R K, Chaudhury A. Physiology of normal esophageal motility. *J Clin Gastroenterol* 2008; 42: 610–9.
- Abraham L Jr, Bhargava V, Babaei A, Ho A, Mittal R K. Swallow induces a peristaltic wave of distension that marches in front of the peristaltic wave of contraction. *Neurogastroenterol Motil* 2011; 23: 201–207.e110.
- Yi C H, Lei W Y, Hung J S *et al.* Differences in the control of secondary peristalsis in the human esophagus: influence of the 5-HT<sub>4</sub> receptor versus the TRPV1 receptor. *PLoS One* 2016; 11: e0159452.
- Carlson D A, Crowell M D, Kimmel J N *et al.* Loss of peristaltic reserve, determined by multiple rapid swallows, is the most frequent esophageal motility abnormality in patients with systemic sclerosis. *Clin Gastroenterol Hepatol* 2016; 14: 1502–6.
- Faul F, Erdfelder E, Lang A G, Buchner A. G\*power 3: a flexible statistical power analysis program for the social, behavioral, and biomedical sciences. *Behav Res Methods* 2007; 39: 175–91.
- Sifrim D, Jafari J. Deglutitive inhibition, latency between swallow and esophageal contractions and primary esophageal motor disorders. *J Neurogastroenterol Motil* 2012; 18: 6–12.
- Fornari F, Bravi I, Penagini R, Tack J, Sifrim D. Multiple rapid swallowing: a complementary test during standard oesophageal manometry. *Neurogastroenterol Motil* 2009; 21: 718–e741.
- Meyer G W, Gerhardt D C, Castell D O. Human esophageal response to rapid swallowing: muscle refractory period or neural inhibition? *Am J Physiol* 1981; 241: G129–36.
- Price L H, Li Y, Patel A, Gyawali C P. Reproducibility patterns of multiple rapid swallows during high resolution esophageal manometry provide insights into esophageal pathophysiology. *Neurogastroenterol Motil* 2014; 26: 646–53.
- Shaker A, Stoikes N, Drapekin J, Kushnir V, Brunt L M, Gyawali C P. Multiple rapid swallow responses during esophageal high-resolution manometry reflect esophageal body peristaltic reserve. *Am J Gastroenterol* 2013; 108: 1706–12.
- Ang D, Hollenstein M, Misselwitz B *et al.* Rapid drink challenge in high-resolution manometry: an adjunctive test for detection of esophageal motility disorders. *Neurogastroenterol Motil* 2017; 29: e12902.
- Marin I, Cisternas D, Abrao L *et al.* Normal values of esophageal pressure responses to a rapid drink challenge test in healthy subjects: results of a multicenter study. *Neurogastroenterol Motil* 2017; 29: e13021.
- Mauro A, Quader F, Tolone S *et al.* Provocative testing in patients with jackhammer esophagus: evidence for altered neural control. *Am J Physiol Gastrointest Liver Physiol* 2019; 316: G397–g403.
- Snyder D L, Valdovinos L R, Horsley-Silva J L, Crowel M D, Valdovinos M A, Vela M F. Opioids interfere with Deglutitive inhibition assessed by response to multiple rapid swallows during high-resolution esophageal manometry. *Am J Gastroenterol* 2020 (forthcoming).
- Mauro A, Savarino E, De Bortoli N *et al.* Optimal number of multiple rapid swallows needed during high-resolution esophageal manometry for accurate prediction of contraction reserve. *Neurogastroenterol Motil* 2018; 30: e13253.
- Mauro A, Consonni D, Penagini R. Rapid drink challenge and multiple rapid swallowing: reproducibility of esophageal function assessment. *Neurogastroenterol Motil* 2017; 29: 1.
- Vega K J, Rabaa E, Jamal M M. Lower esophageal sphincter pressure and distal esophageal body function between Hispanic Americans and non-Hispanic whites are equivalent. *J Clin Gastroenterol* 2007; 41: 141–4.
